# Supplementary material for: Synthesis and Morphological Control of Biocompatible Fluorescent/Magnetic Janus Nanoparticles Based on the Self-Assembly of Fluorescent Polyurethane and Fe3O4 Nanoparticles
Source: MDPI journal article supplement (doi:10.3390/polym11020272), 2019-02-05
Supplement: s1 [file s1]

# Synthesis and Morphological Control of Biocompatible Fluorescent/Magnetic Janus Nanoparticles Based on the Self-Assembly of Fluorescent Polyurethane and Fe<sub>3</sub>O<sub>4</sub> Nanoparticles

Botian Li <sup>1,4</sup>, Wei Shao <sup>1</sup>, Yanzan Wang <sup>1</sup>, Da Xiao <sup>1</sup>, Yi Xiong <sup>3</sup>, Haimu Ye <sup>1</sup>, Qiong Zhou <sup>1,\*</sup>, Qingjun Jin <sup>2,4,\*</sup>

<sup>1</sup> Department of Materials Science and Engineering, China University of Petroleum, Beijing, 102249, P. R. China; botian.li@cup.edu.cn (B.L.); shao222333@sina.com (W.S.); wangyanzan\_cup@163.com (Y.W.); 18811372167@163.com (D.X.); yehaimu@cup.edu.cn (H.Y.)

<sup>2</sup> Research Institute of Chemical Defense, Academy of Military Sciences, Beijing, 102205, P. R. China.

<sup>3</sup> College of Safety and Ocean Engineering, China University of Petroleum, Beijing, 102249, P. R. China; xiongyi@cup.edu.cn (Y.X.)

<sup>4</sup> Key Laboratory of Advanced Materials of Ministry of Education of China, Department of Chemical Engineering, Tsinghua University, 100084, P. R. China.

\* Correspondence: zhouqiong\_cn@163.com (Q.Z.); jinqingjun502@163.com (Q.J.); Tel.: +86-10-8973-3200

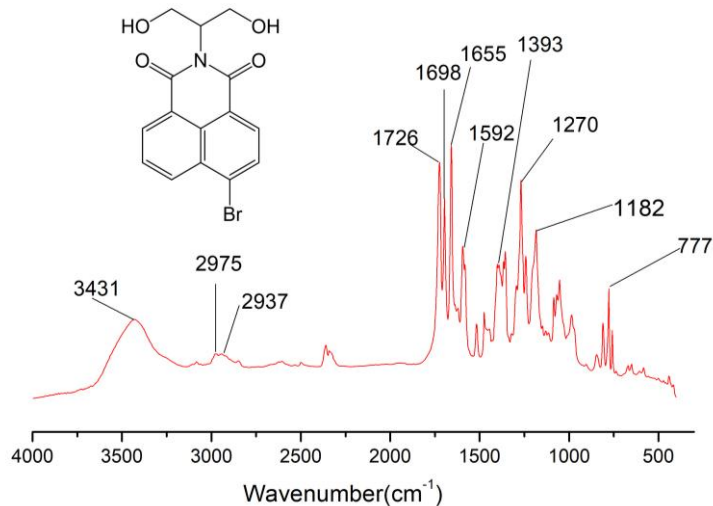

**Figure S1.** FT-IR spectroscopy of BHHNA.

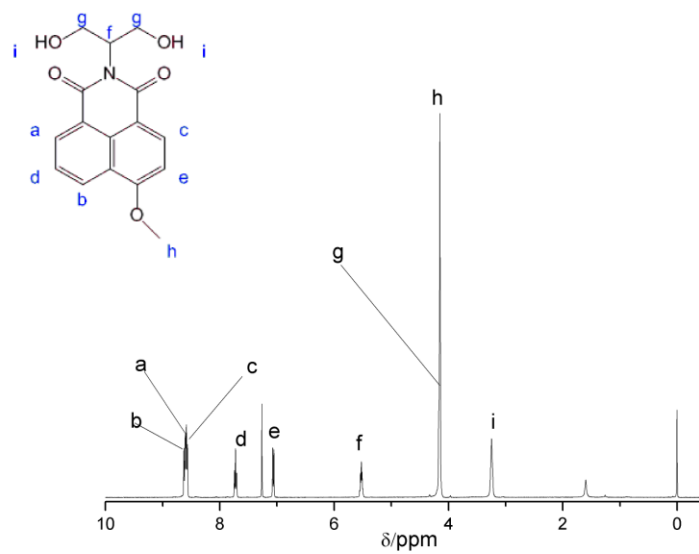

**Figure S2.**  $^1\text{H}$  NMR spectrum of MHHNA.

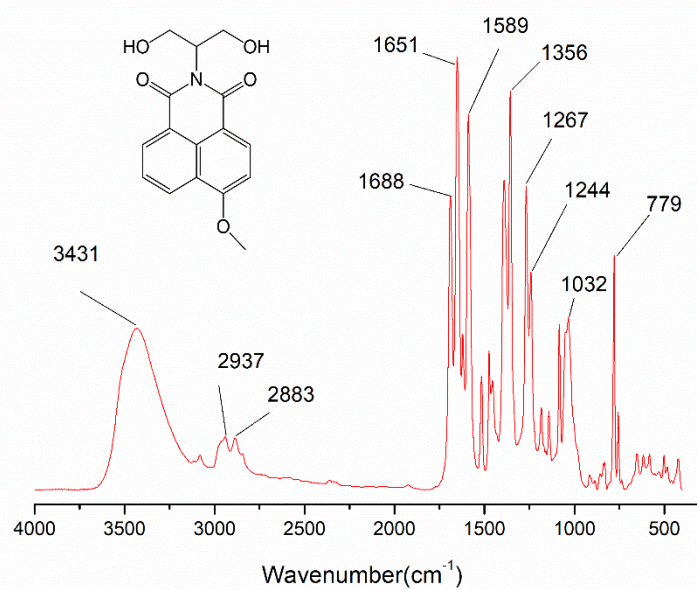

**Figure S3.** FT-IR spectroscopy of MHHNA.

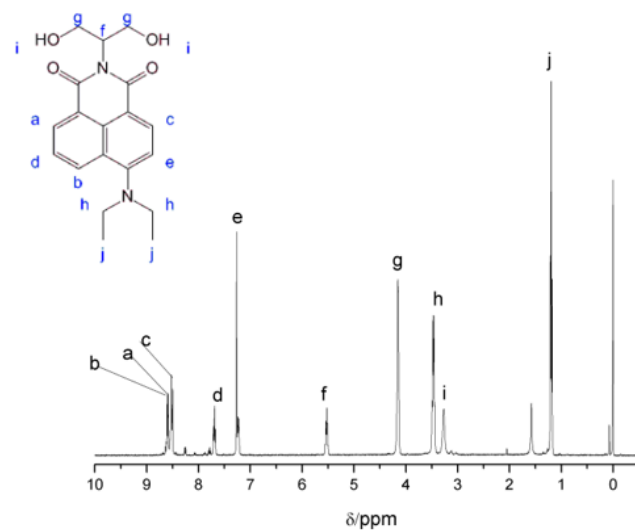

**Figure S4.**  $^1\text{H}$  NMR spectrum of DHHNA.

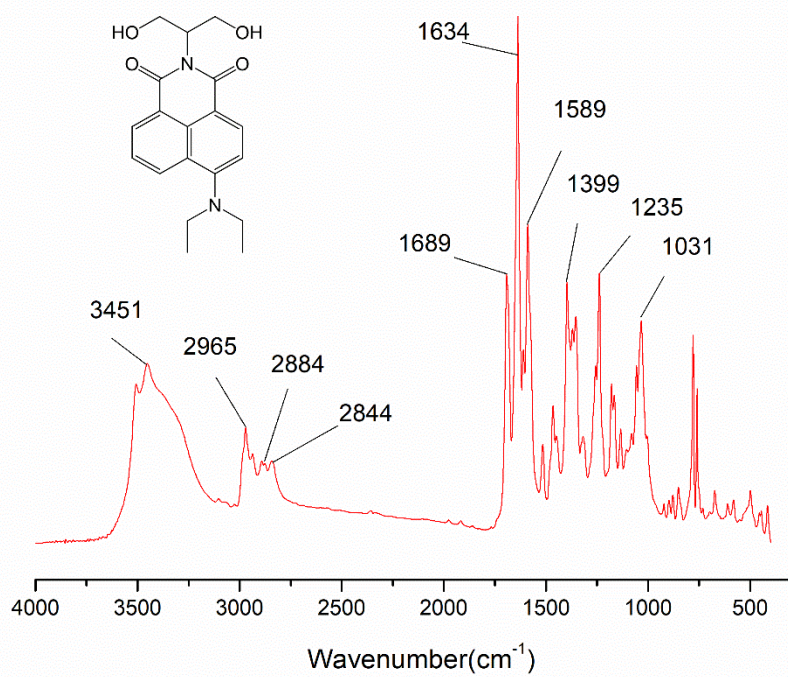

**Figure S5.** FT-IR spectroscopy of DHHNA.

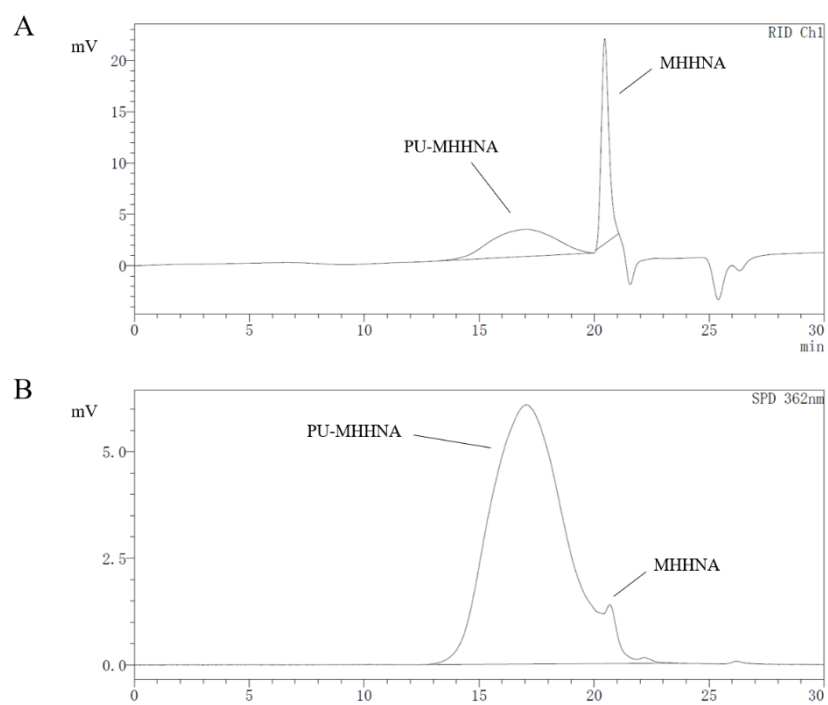

**Figure S6.** GPC analysis of PU-MHHNA (**A**) with a refractive index detector and (**B**) with an UV-Vis detector.

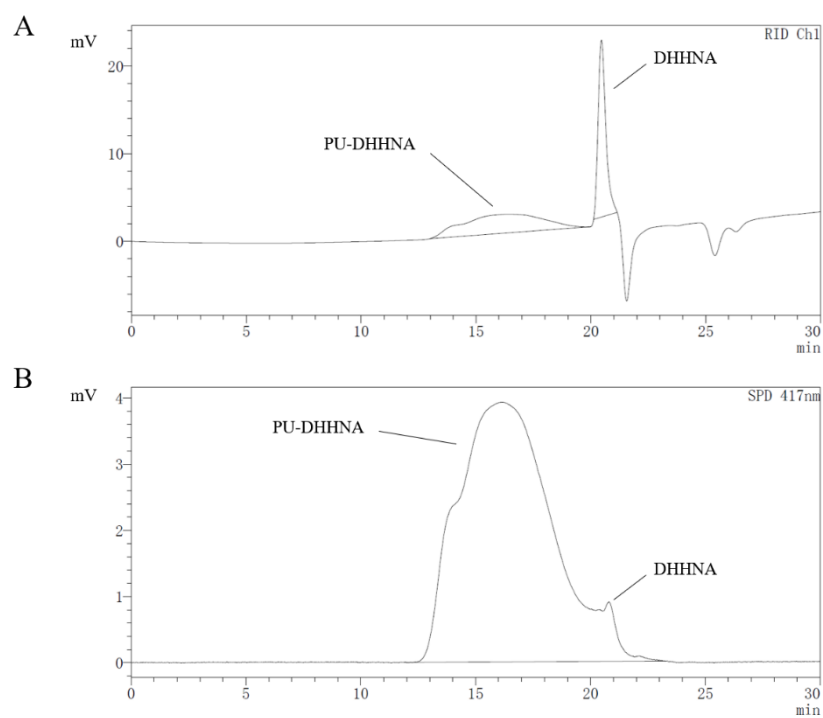

**Figure S7.** GPC analysis of PU-DHHNA (**A**) with a refractive index detector and (**B**) with an UV-Vis detector.

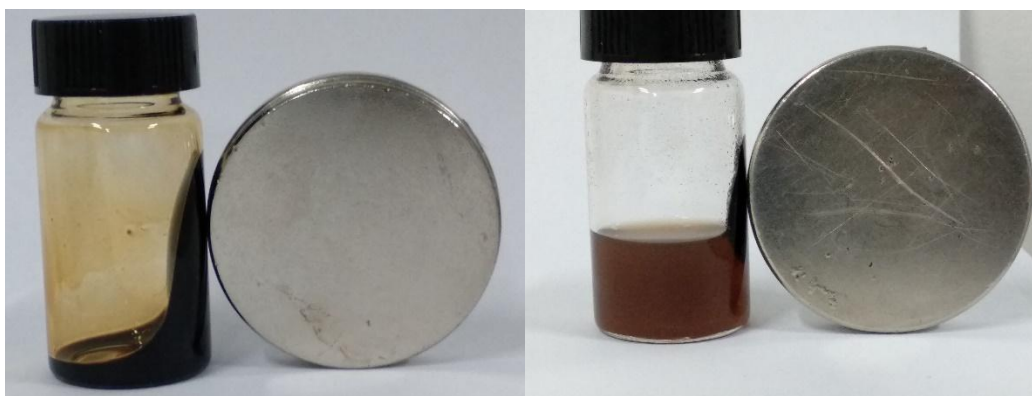

**Figure S8.** Photographs of the  $\text{Fe}_3\text{O}_4$  nanoparticles dissolved in good solvent (toluene) (left) and precipitated in poor solvent (ethanol) (right) with an external magnetic field.

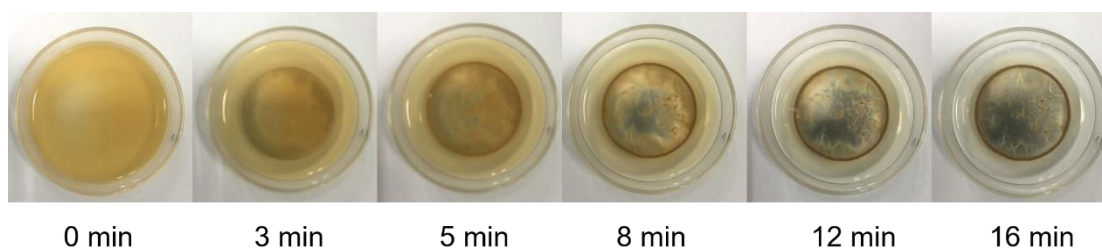

**Figure S9.** Photographs of the PDCEP-2 latex with a magnet underneath at different times.

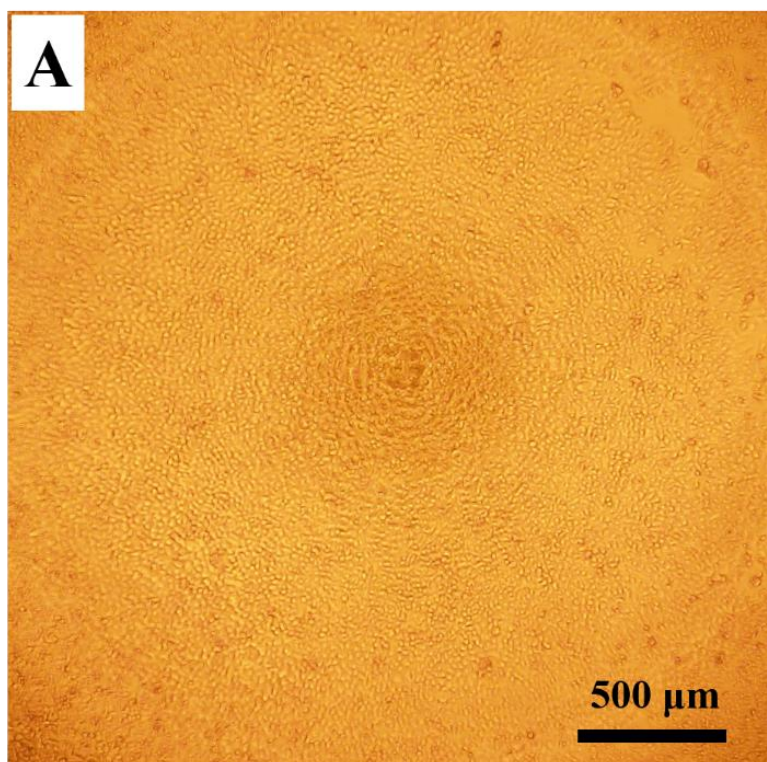



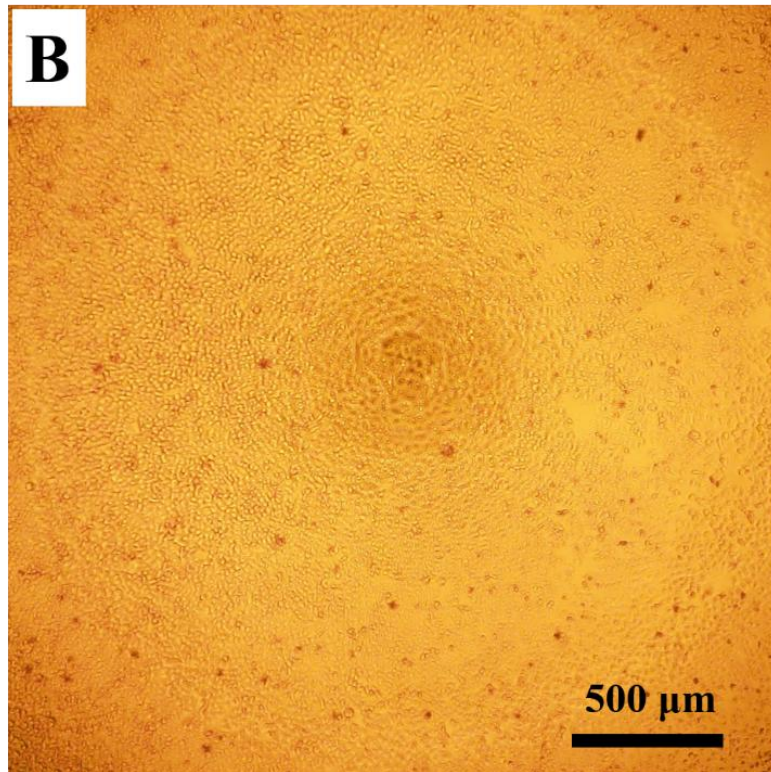

**Figure S10.** Optical microscopy of the dyed cells after 80 min incubation with (A) PMCP-2 and (B) PDCP-2.
